# Supplementary material for: Boosting hydrogen peroxide production of brookite TiO2 with Au and MXene co-catalysis under UV light
Source: Royal Society of Chemistry journal article supplement (doi:10.1039/d3cy01098h), 2023-01-01
Supplement: d3cy01098h1.pdf [file d3cy01098h1.pdf]

## Supporting information

# Boosting Hydrogen Peroxide Production of Brookite TiO<sub>2</sub> under UV Light through Au and MXene Co-catalysis

Xiaoyu Sun<sup>a</sup>, Tianyi Wang<sup>b,\*</sup>, Chengyin Wang<sup>b,\*</sup>, Teruhisa Ohno<sup>a,\*\*</sup>

<sup>a</sup> Department of Applied Chemistry, Faculty of Engineering, Kyushu Institute of Technology, 1 - 1 Sensuicho, Tobata, Kitakyushu 804-8550, Japan

<sup>b</sup> School of Chemistry and Chemical Engineering, Yangzhou University, Yangzhou 225002, China

Email addresses:

Tianyi Wang: wangty@yzu.edu.cn

Chengyin Wang: wangcy@yzu.edu.cn

Teruhisa Ohno: [tohno@che.kyutech.ac.jp](mailto:tohno@che.kyutech.ac.jp)

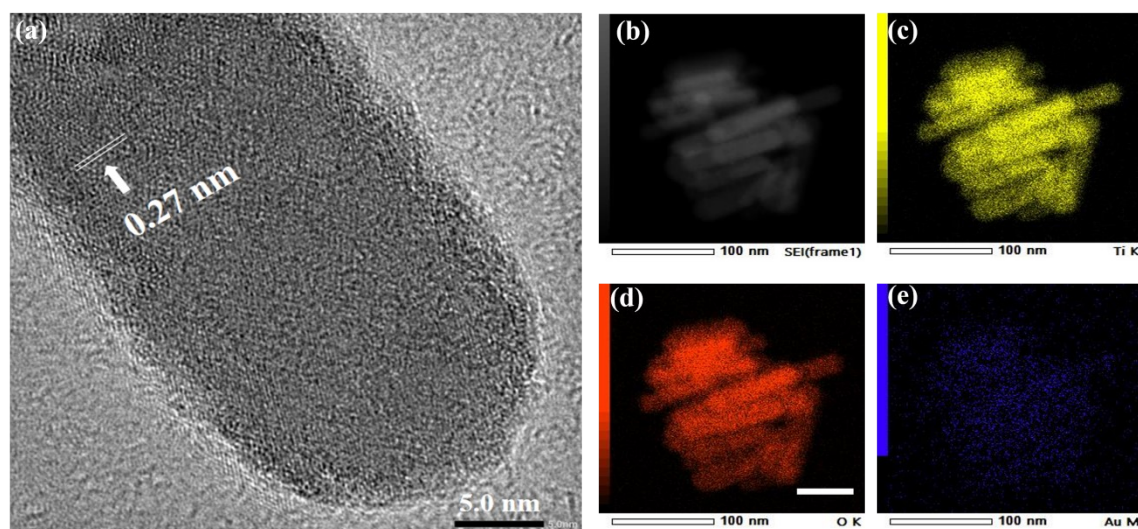

Figure S1. (a) HR TEM image of pure brookite TiO<sub>2</sub>; (b)-(e) TEM EDS mapping pictures of TiO<sub>2</sub>/Au

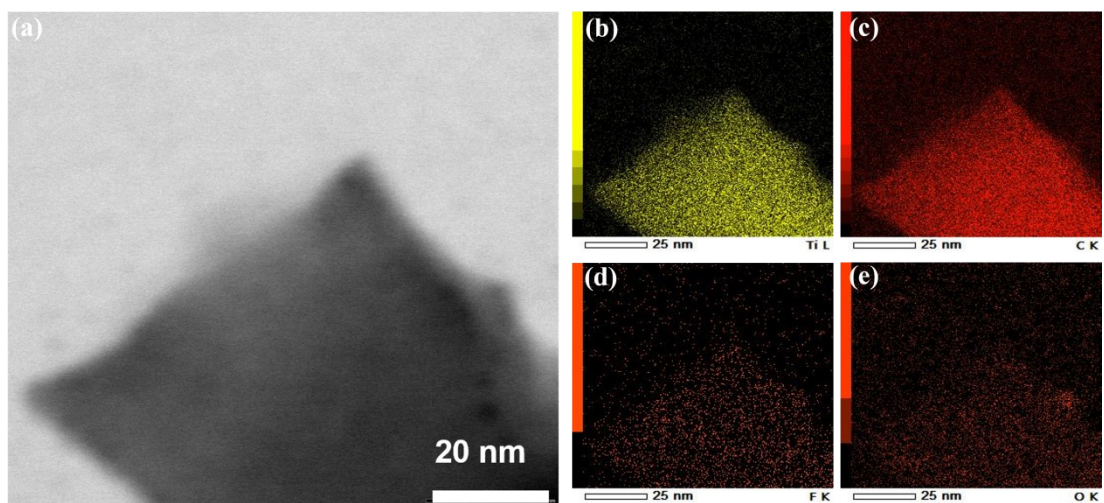

Figure S2. (a)-(f) EDS mapping pictures of MXene

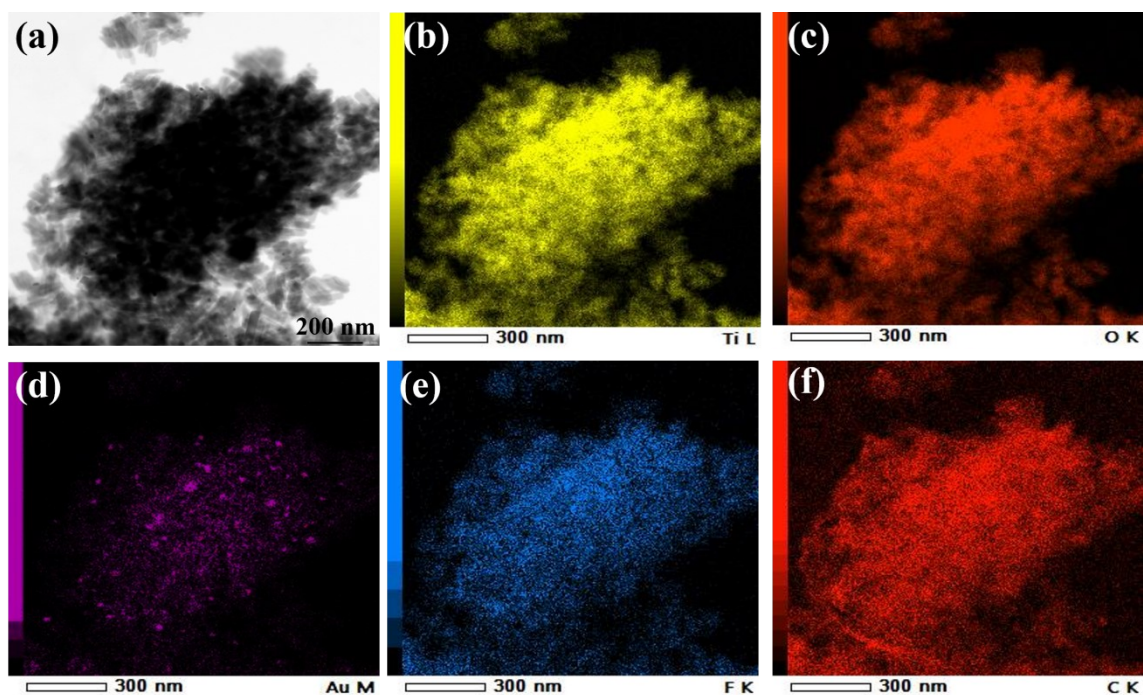

Figure S3. (a)-(f) EDS mapping pictures of TiO<sub>2</sub>/Au/MXene;

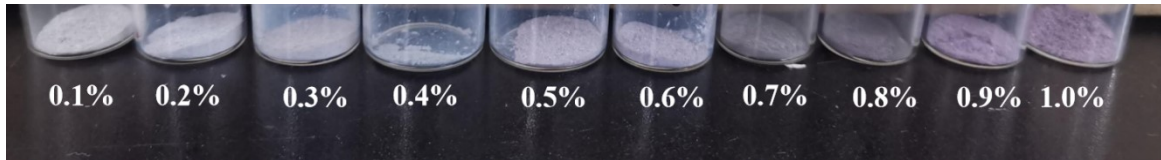

Figure S4. The photos of  $\text{TiO}_2/\text{Au}$  with 0.1 %-1.0 % Au content.

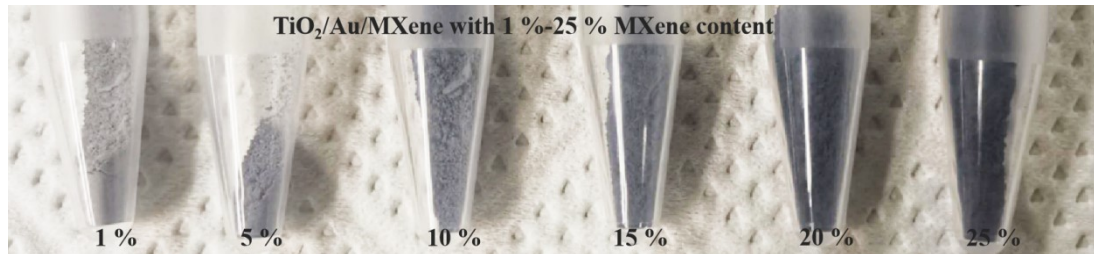

Figure S5. The photos of  $\text{TiO}_2/\text{Au}/\text{MXene}$  with 1 %-25 % MXene content.

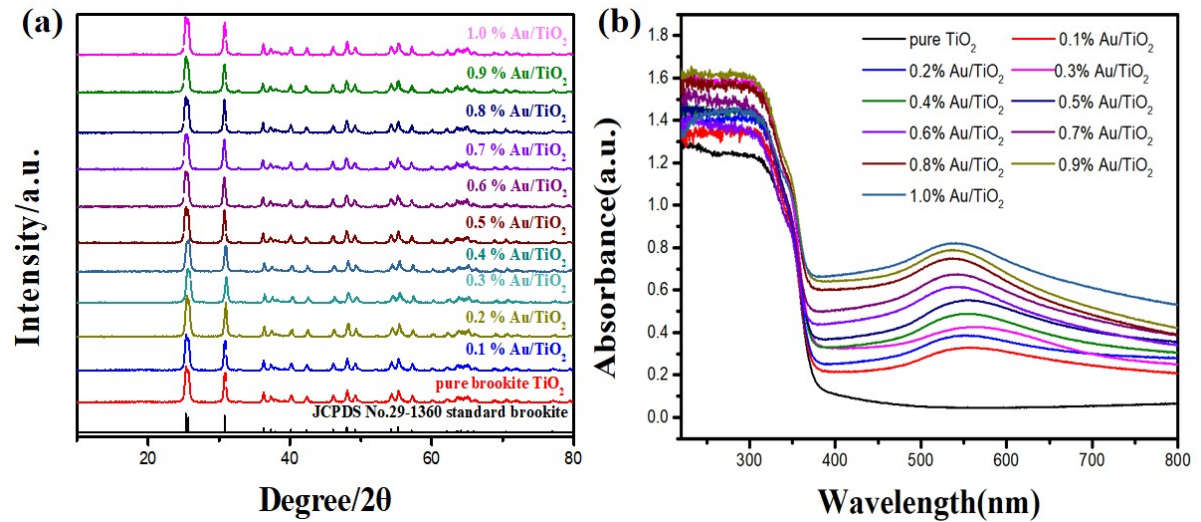

Figure S6. (a) XRD data of brookite  $\text{TiO}_2$  and  $\text{TiO}_2/\text{Au}$  with different Au content; (b) Uv-vis of brookite  $\text{TiO}_2$  and  $\text{TiO}_2/\text{Au}$  with 0.1%-1.0% Au content.



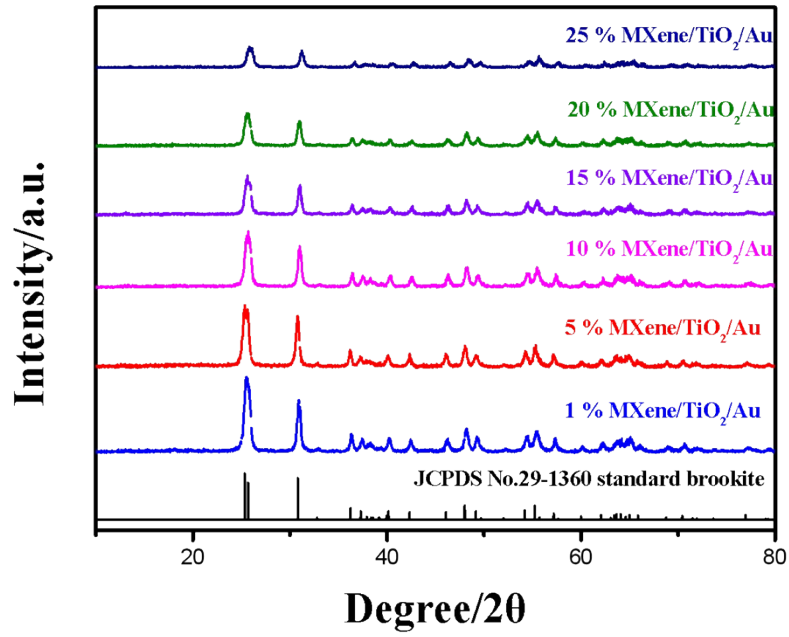

Figure S7. XRD data of TiO<sub>2</sub>/Au/MXene with different MXene content.

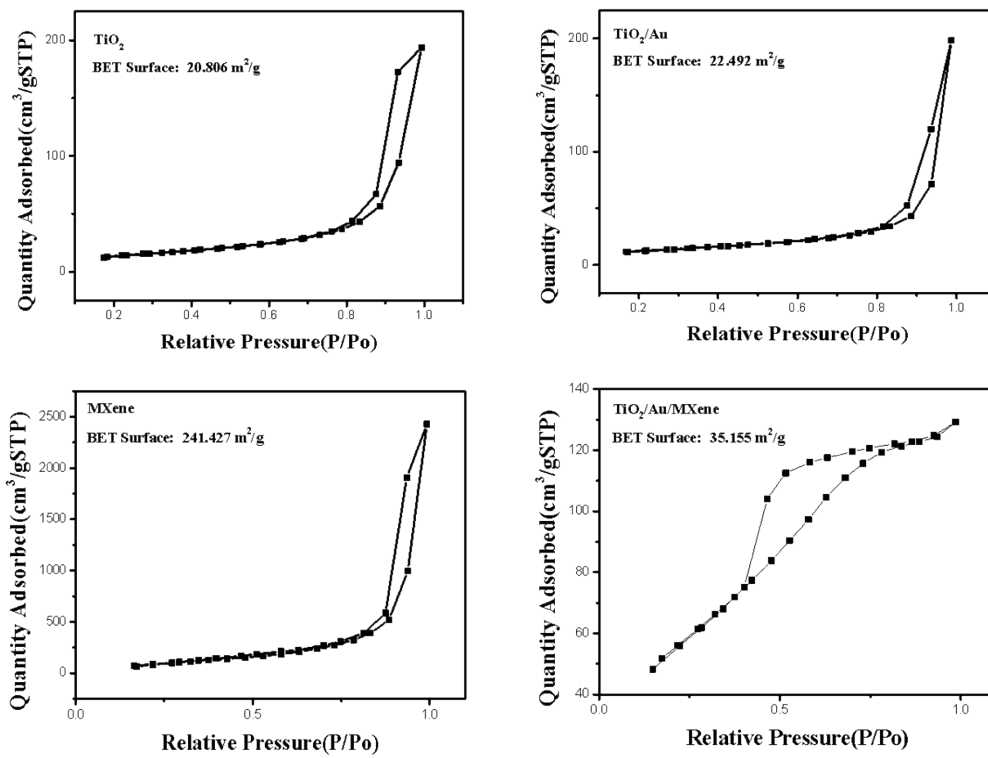

Figure S8. Nitrogen adsorption-desorption isotherms of TiO<sub>2</sub>, MXene, TiO<sub>2</sub>/Au and TiO<sub>2</sub>/Au/MXene.

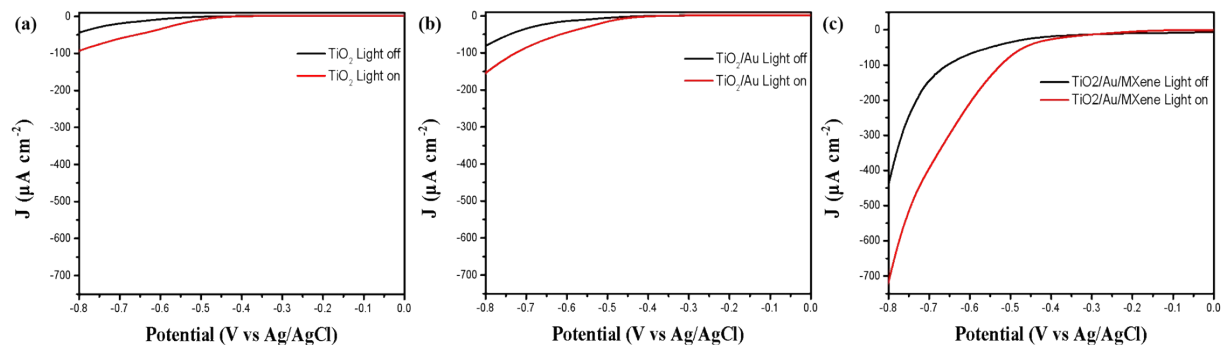

**Figure S9.** LSV data of (a) Brookite  $\text{TiO}_2$ ; (b)  $\text{TiO}_2/\text{Au}$  and (c)  $\text{TiO}_2/\text{Au}/\text{MXene}$  at  $\text{pH}=6.09$ .

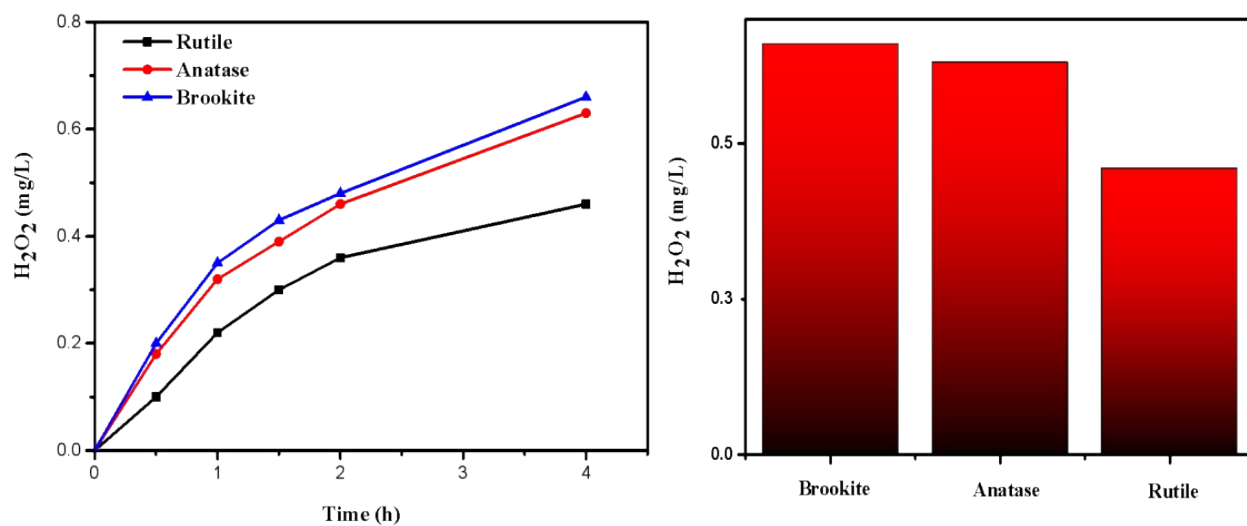

**Figure S10.** (a) Amounts of  $\text{H}_2\text{O}_2$  production from Rutile, Anatase and Brookite  $\text{TiO}_2$ ; (b) Amounts of  $\text{H}_2\text{O}_2$  production from Rutile, Anatase and Brookite  $\text{TiO}_2$  after 4 hours.

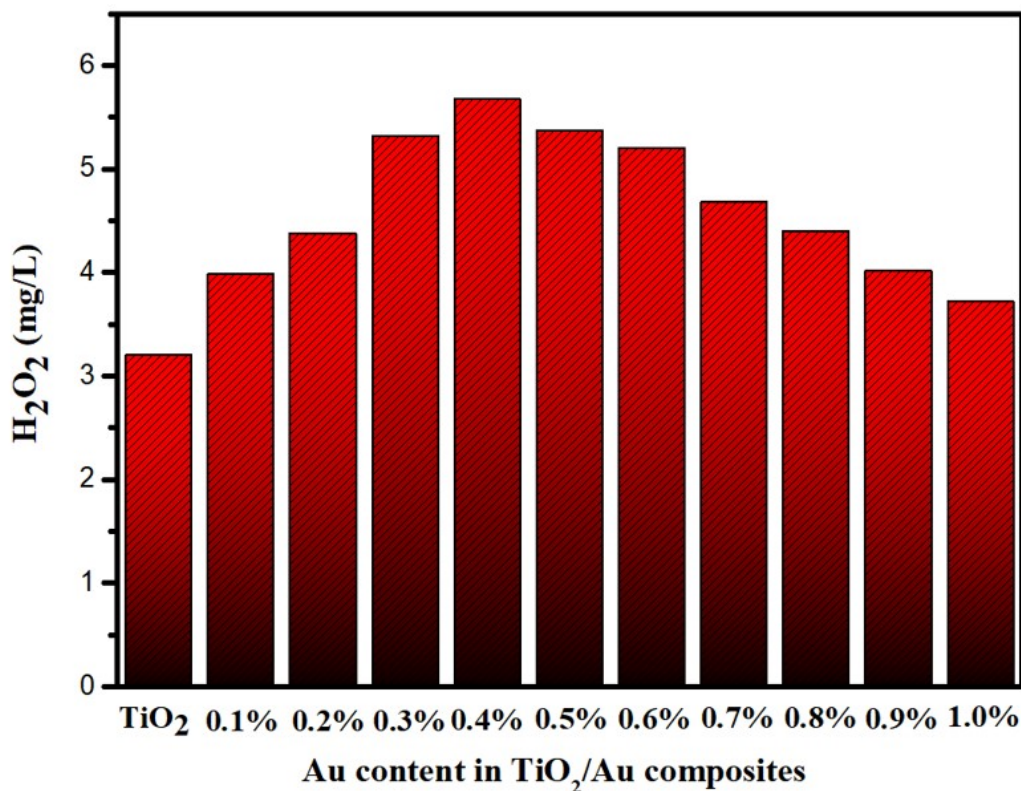

Figure S11. Amounts of H<sub>2</sub>O<sub>2</sub> production from TiO<sub>2</sub>/Au with different MXene content after 4 hours under the condition of pH=7 with UV light .

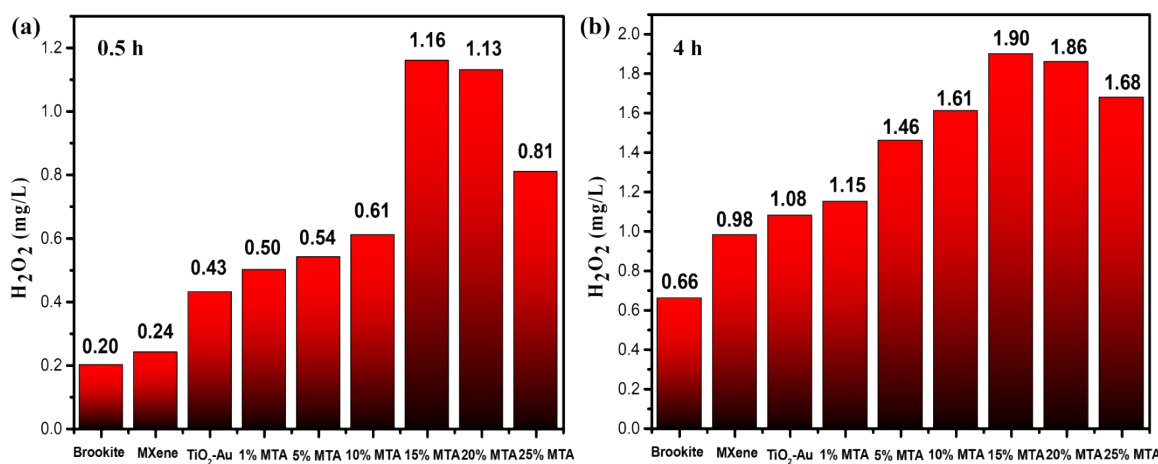

Figure S12. Amounts of H<sub>2</sub>O<sub>2</sub> production from TiO<sub>2</sub>/Au/MXene with different MXene content after 0.5 and 4 hours under the condition of pH=7 with UV light .

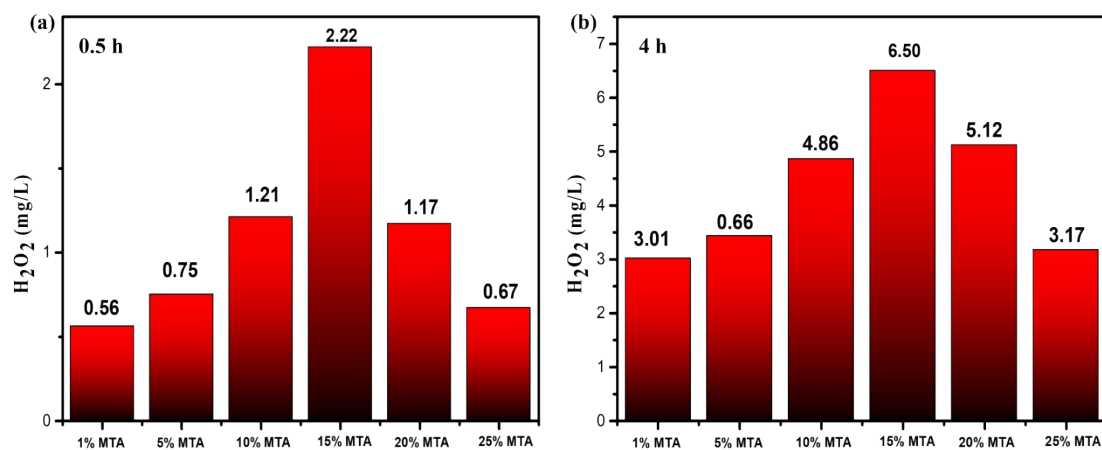

Figure S13. Amounts of  $H_2O_2$  production from  $TiO_2/Au/MXene$  with different MXene content 0.5 and after 4 hours under the condition of pH=3 with UV light.

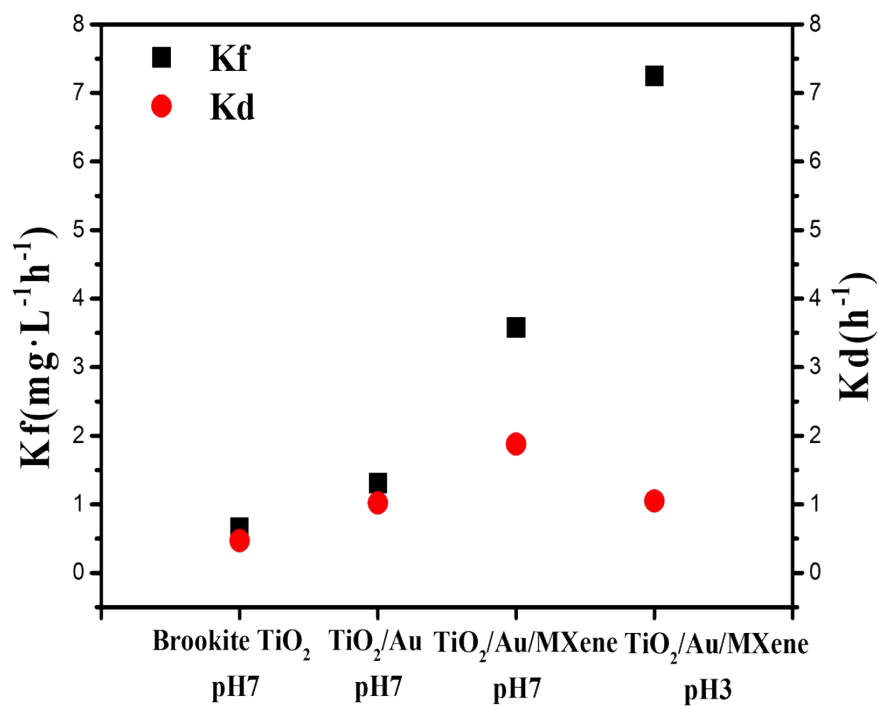

**Figure S14. Formation rate constant (Kf) and decomposition rate constant (Kd) for H<sub>2</sub>O<sub>2</sub> production.**

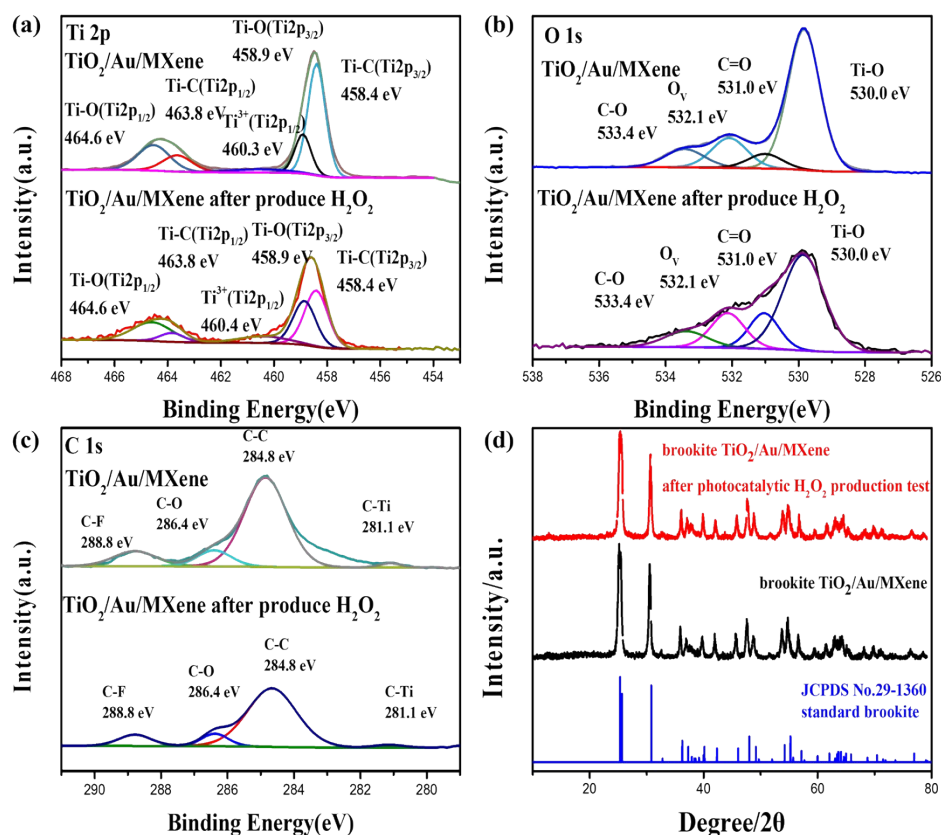

**Figure S15. XPS and XRD of TiO<sub>2</sub>/Au/MXene before and after H<sub>2</sub>O<sub>2</sub> production.**

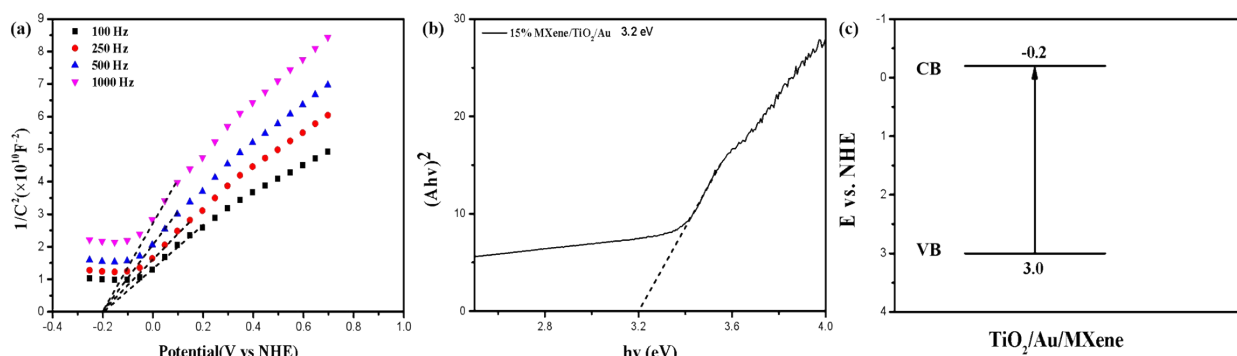

**Figure S16. Mott-Schottky plots of TiO<sub>2</sub>/Au/MXene.**

**Table S1. Comparison with other photocatalysts based on TiO<sub>2</sub> for H<sub>2</sub>O<sub>2</sub> production.**

| Photocatalysts | Concentration of photocatalyst (g L <sup>-1</sup> ) | Light source | H <sub>2</sub> O <sub>2</sub> yields (μmol g <sup>-1</sup> h <sup>-1</sup> ) | References |
|----------------|-----------------------------------------------------|--------------|------------------------------------------------------------------------------|------------|
|----------------|-----------------------------------------------------|--------------|------------------------------------------------------------------------------|------------|



|                                                                 |     |                                  |               |           |
|-----------------------------------------------------------------|-----|----------------------------------|---------------|-----------|
|                                                                 |     | 300 W Xe lamp ( $\lambda > 420$  |               |           |
| Ti <sub>3</sub> C <sub>2</sub> /g-C <sub>3</sub> N <sub>4</sub> | 1.0 | nm)                              | 131.71        | [2]       |
| Pd/APTMS/TiO <sub>2</sub>                                       | -   | -                                | 150           | [5]       |
| Ti <sub>3</sub> C <sub>2</sub> /TiO <sub>2</sub>                | 1.0 | 5 W lamp ( $\lambda = 365$ nm)   | 179.71        | [19]      |
|                                                                 |     | 500 W Hg lamp ( $\lambda = 300-$ |               |           |
| Cu <sup>2+</sup> /TiO <sub>2</sub>                              | 100 | 400 nm)                          | 0.96          | [41]      |
|                                                                 |     | 450 W Hg lamp ( $\lambda = 280-$ |               |           |
| Au-Ag/TiO <sub>2</sub>                                          | 1.0 | 400 nm)                          | 150           | [42]      |
|                                                                 |     | 125 W Hg Lamp ( $\lambda < 320$  |               |           |
| Zn <sup>2+</sup> /TiO <sub>2</sub>                              | 0.5 | nm)                              | 146.67        | [43]      |
| Au/TiO <sub>2</sub>                                             | 1.0 | Hg lamp ( $\lambda > 320$ nm)    | 243.33        | [44]      |
| Au/SnO <sub>2</sub> -TiO <sub>2</sub>                           | 1.0 | 300 W Xe lamp (UV light)         | 600           | [45]      |
|                                                                 |     | 300 W Xe lamp (360               |               |           |
| <b>TiO<sub>2</sub>/Au/MXene</b>                                 | 0.5 | nm $<\lambda<380$ nm)            | <b>331.76</b> | This work |
